# Supplementary material
Source: publisher figshare collection journal article supplement (https://acs.figshare.com/ndownloader/files/17514173)
Supplement: Supplementary file 1 [file 17514173]

## Sheet: Primary data
			Amount (fmol)																	% total protein
	Accession Nb	Description	Pre(hep+hPc) - no hep = D0				Pre(hep+hPc) - 1IU = D1				Pre(hep)Pre(hPc) - 1IU = B1				Pre(hPc)Pre(hep) - 1IU = A1					Pre(hep+hPc) - no hep = D0				Pre(hep+hPc) - 1IU = D1				Pre(hep)Pre(hPc) - 1IU = B1				Pre(hPc)Pre(hep) - 1IU = A1
			a	b	c	average	a	b	c	average	a	b	c	average	a	b	c	average		a	b	c	average	a	b	c	average	a	b	c	average	a	b	c	average
	P43652	Afamin	0.619953	0.596544	0.607296	0.607931	0.737502	0.722369	0.751786	0.737219	0.523892	0.610438	0.602505	0.578945	0.863564	0.862178	0.839692	0.855145		0.0463216	0.0515282	0.0538075	0.0503155	0.0608168	0.0640944	0.0706856	0.0649863	0.0463391	0.0587916	0.0579016	0.0541165	0.0505037	0.0557825	0.0602832	0.0551894
	P01011	Alpha-1-antichymotrypsin	0.597454	0.598302	0.645106	0.613621	1.13312	1.20278	1.19855	1.17815	2.12778	1.95828	1.91658	2.00088	1.13907	1.13506	1.04995	1.10803		0.0446405	0.0516801	0.0571576	0.0507864	0.0934409	0.10672	0.112692	0.103855	0.188206	0.188603	0.184187	0.187031	0.066616	0.0734379	0.0753781	0.0715099
	P01009	Alpha-1-antitrypsin	1.06115	0.938201	0.989761	0.996371	1.41396	1.50952	1.46083	1.46144	1.36906	1.2094	1.19183	1.25676	1.22347	1.21951	1.12295	1.18864		0.0792869	0.0810398	0.0876947	0.0824647	0.116599	0.133937	0.137353	0.128827	0.121095	0.116477	0.114536	0.117475	0.0715518	0.0789015	0.0806192	0.0767127
	P08697	Alpha-2-antiplasmin	1.34912	1.08581	1.04506	1.16	0.223598	0.204926	0.190152	0.206226	0.278817	0.198346	0.212269	0.229811	0.126181	0.121993	0.111379	0.119851		0.100804	0.0937896	0.0925946	0.0960073	0.0184386	0.0181827	0.0178788	0.0181789	0.0246618	0.0191028	0.0203994	0.0214814	0.00737941	0.00789291	0.00799615	0.00773496
	P02765	Alpha-2-HS-glycoprotein	0.54073	0.260002	0.245332	0.348688	0.428043	0.285721	0.283259	0.332341	0.960427	0.607471	0.60842	0.725439	0.415538	0.246633	0.23371	0.298627		0.0404022	0.0224584	0.0217369	0.0288592	0.0352978	0.0253514	0.026633	0.029296	0.0849512	0.0585059	0.0584701	0.06781	0.0243019	0.0159571	0.0167785	0.0192728
	P01023	Alpha-2-macroglobulin	1.89429	1.97965	1.89771	1.92388	2.59963	2.78403	2.57818	2.65395	4.84349	4.38133	4.19204	4.47229	2.21993	2.45888	2.31851	2.33244		0.141537	0.170998	0.168141	0.15923	0.214374	0.247021	0.24241	0.233947	0.428414	0.421969	0.402862	0.418044	0.129828	0.159089	0.16645	0.150531
	P01008	Antithrombin-III	0.178491	0.101615	0.167299	0.149135	0.679578	0.59962	0.574427	0.617875	1.01289	0.997381	0.971007	0.993761	0.255662	0.181626	0.2028	0.213363		0.0133365	0.00877725	0.014823	0.0123432	0.0560402	0.0532031	0.0540096	0.0544661	0.0895921	0.0960583	0.0933153	0.0928912	0.0149518	0.0117512	0.0145594	0.01377
	P02647;Q9HB71	Apolipoprotein A-I	161.431	118.256	119.362	133.016	115.465	114.144	108.015	112.542	133.738	134.816	128.266	132.273	115.575	102.292	98.9413	105.603		12.0618	10.2147	10.5757	11.0091	9.52164	10.1278	10.156	9.92062	11.8293	12.9842	12.3265	12.3642	6.75916	6.61823	7.1032	6.81539
	P02652	Apolipoprotein A-II	4.59449	4.6252	5.7253	4.98166	6.07691	5.40907	6.69876	6.06158	5.66323	5.11017	5.35644	5.37661	3.93688	3.85445	4.79612	4.19582		0.34329	0.399515	0.507272	0.412308	0.501122	0.479936	0.629841	0.534332	0.500921	0.492163	0.514762	0.502575	0.23024	0.249381	0.344324	0.27079
	P06727	Apolipoprotein A-IV	23.5247	20.445	21.0852	21.685	25.202	21.7557	20.4858	22.4812	16.2889	15.1252	15.9965	15.8036	30.5447	25.4734	23.4632	26.4938		1.75772	1.76599	1.86819	1.79476	2.07824	1.93034	1.92614	1.98173	1.44078	1.45672	1.53729	1.47723	1.78634	1.64812	1.68447	1.70986
	P04114	Apolipoprotein B-100	5.99893	4.68782	4.41659	5.03445	4.66772	3.76094	3.76228	4.06365	5.27468	4.36448	4.34811	4.66242	3.18116	2.5062	2.38439	2.69058		0.448228	0.404924	0.391318	0.416677	0.384915	0.333701	0.353743	0.358213	0.466553	0.420346	0.41786	0.435817	0.186044	0.16215	0.17118	0.173645
	P02656	Apolipoprotein C-III	18.6262	16.0822	16.1309	16.9464	14.8916	13.3237	12.7792	13.6648	12.6636	10.781	10.2571	11.2339	28.3525	22.1539	20.3331	23.6132		1.39171	1.38915	1.42923	1.40257	1.22801	1.18218	1.20155	1.20456	1.12011	1.03833	0.98572	1.05008	1.65814	1.43335	1.45975	1.52395
	P02649	Apolipoprotein E	21.4068	18.6051	18.1503	19.3874	24.2879	22.9458	21.3282	22.854	27.9535	25.461	24.8524	26.089	23.6783	20.7511	19.2669	21.2321		1.59947	1.60707	1.60815	1.6046	2.00285	2.03594	2.00535	2.01459	2.47253	2.45216	2.38836	2.43865	1.38477	1.34259	1.38321	1.37028
	P02730	Band 3 anion transport protein	1.45333	1.49632	1.37037	1.44	1.36495	1.36085	1.31194	1.34591	0.867323	0.867707	0.844965	0.859998	1.40243	1.11642	1.03928	1.18604		0.108589	0.129249	0.121417	0.119182	0.112559	0.120745	0.123353	0.118643	0.076716	0.0835693	0.0812025	0.0803878	0.0820183	0.0722316	0.0746122	0.076545
	P02749	Beta-2-glycoprotein 1	2.94271	2.65471	2.50249	2.69997	5.32663	4.27075	4.45793	4.68511	3.5904	2.95214	2.85916	3.1339	3.8593	2.42304	2.49734	2.92656		0.219873	0.229308	0.221726	0.223463	0.439251	0.378936	0.41915	0.412995	0.317577	0.284322	0.27477	0.292939	0.225703	0.15677	0.179289	0.188874
	Q96CX2	BTB/POZ domain-containing protein KCTD12	4.54834	4.11577	4.30812	4.32408	4.19113	4.54357	4.23196	4.32222	4.2595	4.28016	4.25996	4.26654	4.75168	4.51097	4.34104	4.53457		0.339842	0.355511	0.381708	0.357883	0.345614	0.403142	0.397904	0.381007	0.37676	0.412225	0.409389	0.398812	0.277892	0.291858	0.311652	0.292652
	P04003	C4b-binding protein alpha chain	3.13554	2.75626	2.772	2.88793	2.28045	2.09398	2.06847	2.14763	2.04027	1.85346	2.04682	1.98019	4.14891	4.22134	3.88896	4.0864		0.234281	0.23808	0.245604	0.23902	0.188053	0.185795	0.194485	0.189315	0.180465	0.178508	0.196703	0.185096	0.24264	0.273119	0.279197	0.263729
	O43866	CD5 antigen-like	1.35948	1.12514	1.05094	1.17852	1.16704	0.966491	0.920519	1.01802	0.863973	0.751552	0.777083	0.797536	1.19578	1.06555	0.907633	1.05632		0.101577	0.0971873	0.0931155	0.0975404	0.0962376	0.0857548	0.0865504	0.0897387	0.0764198	0.0723824	0.0746789	0.0745492	0.0699327	0.0689405	0.0651609	0.0681729
	P00450	Ceruloplasmin	2.24545	2.16931	2.16937	2.19471	2.44499	2.16626	2.16775	2.25967	2.64006	2.9394	2.92945	2.8363	1.0295	0.945707	0.895193	0.9568		0.167776	0.18738	0.19221	0.181646	0.201622	0.192208	0.203819	0.199191	0.233517	0.283095	0.281525	0.265122	0.0602081	0.0611869	0.0642677	0.06175
	P10909	Clusterin	171.948	147.766	137.157	152.29	121.971	111.798	102.705	112.158	110.447	95.2644	100.909	102.207	136.586	116.681	106.72	119.996		12.8476	12.7637	12.1524	12.6043	10.0581	9.91959	9.65668	9.88678	9.76919	9.17496	9.69754	9.55371	7.98795	7.5492	7.66166	7.74429
	P00740	Coagulation factor IX	4.55864	4.32541	4.3958	4.42662	4.4155	4.18808	4.08229	4.22862	3.22276	2.81403	2.94448	2.99376	6.25678	5.7087	5.41606	5.79385		0.340612	0.37362	0.389476	0.366369	0.364116	0.371601	0.383831	0.372756	0.285058	0.271021	0.282969	0.279839	0.365914	0.369351	0.38883	0.373924
	P08709	Coagulation factor VII	0.298411	0.281473	0.289841	0.289908	0.201955	0.167144	0.15392	0.17434	0.174549	0.138257	0.148656	0.153821	0.716181	0.574971	0.558725	0.616626		0.0222967	0.0243131	0.0256804	0.0239943	0.0166539	0.0148304	0.0144721	0.0153682	0.0154391	0.0133157	0.0142861	0.0143783	0.0418843	0.0372004	0.040112	0.0397958
	P02747	Complement C1q subcomponent subunit C	1.58566	1.51694	1.60407	1.56889	1.7704	1.9641	1.85247	1.86232	1.90562	1.59675	1.60306	1.70181	1.35546	1.34052	1.25988	1.31862		0.118477	0.13103	0.142124	0.129849	0.145993	0.17427	0.174176	0.164165	0.168555	0.153784	0.154057	0.159076	0.0792715	0.0867309	0.0904495	0.0851012
	P01024	Complement C3	6.67676	6.66199	6.6189	6.65255	6.0889	6.02386	5.90965	6.00747	5.59902	5.41333	5.6465	5.55295	5.63764	5.28548	5.25179	5.39164		0.498874	0.575448	0.586447	0.550599	0.50211	0.534486	0.555646	0.529562	0.495242	0.52136	0.542638	0.519059	0.329705	0.341969	0.377037	0.347966
	P0C0L5	Complement C4-B	1.46295	1.62042	1.4754	1.51959	1.56362	1.41436	1.38989	1.45595	1.12346	1.106	1.12474	1.11806	1.39342	1.35072	1.059	1.26771		0.109309	0.139968	0.130723	0.125769	0.128941	0.125493	0.130682	0.128343	0.0993715	0.106519	0.108089	0.10451	0.0814912	0.087391	0.076028	0.0818158
	P02748	Complement component C9	1.77995	1.67392	1.3948	1.61623	1.27513	1.24753	1.23629	1.25298	1.45099	1.39388	1.38849	1.41112	1.58043	1.58016	1.37465	1.51175		0.132994	0.14459	0.123582	0.133767	0.105152	0.110691	0.11624	0.110451	0.128343	0.134245	0.133436	0.131903	0.0924279	0.102236	0.0986892	0.0975652
	P08603	Complement factor H	2.14516	2.86936	2.82139	2.61197	2.04242	2.15238	2.17106	2.12195	2.90082	3.46814	3.59659	3.32185	1.10356	1.35536	1.00038	1.1531		0.160282	0.247849	0.24998	0.21618	0.168424	0.190976	0.204131	0.187051	0.256582	0.334019	0.345638	0.310508	0.0645396	0.0876916	0.0718194	0.0744191
	Q14204	Cytoplasmic dynein 1 heavy chain 1	10.0298	10.5003	9.82258	10.1176	12.0578	11.5755	11.6493	11.7609	12.0622	12.3706	12.8017	12.4115	17.7454	15.6579	15.1196	16.1743		0.749408	0.906996	0.870299	0.837383	0.994323	1.02708	1.09531	1.03673	1.06692	1.19142	1.23027	1.16016	1.0378	1.01306	1.08547	1.04386
	P02671	Fibrinogen alpha chain	12.0172	9.94159	10.789	10.916	10.7761	10.6153	10.5211	10.6375	9.80798	9.4926	9.58549	9.62869	5.97656	6.29271	5.70653	5.99193		0.897903	0.858733	0.955929	0.90346	0.888636	0.941873	0.989233	0.937704	0.86753	0.914237	0.921181	0.900035	0.349527	0.407135	0.409684	0.386708
	P02675	Fibrinogen beta chain	13.3518	11.0664	10.9175	11.7786	11.984	10.5342	10.0099	10.8427	10.4841	8.95216	8.86708	9.43444	6.11701	5.49411	4.79423	5.46845		0.997618	0.955895	0.967309	0.974854	0.988243	0.934682	0.941165	0.955793	0.927333	0.862188	0.85214	0.881878	0.35774	0.355467	0.344187	0.352923
	P02679	Fibrinogen gamma chain	14.2856	13.1019	12.232	13.2065	14.9137	13.8011	12.9102	13.875	15.1316	14.269	14.444	14.6149	6.7276	6.06558	5.79048	6.19455		1.06739	1.13172	1.08378	1.09304	1.22983	1.22455	1.21386	1.22309	1.33841	1.37425	1.38809	1.36612	0.39345	0.392441	0.415711	0.399785
	P02751	Fibronectin	6.21485	9.45844	8.85257	8.17529	5.52887	8.57956	8.14892	7.41912	5.71519	7.53048	8.41699	7.22088	10.1392	15.8609	15.0332	13.6778		0.464361	0.817	0.784354	0.676629	0.455929	0.761247	0.76619	0.654	0.505517	0.725264	0.808886	0.674967	0.592967	1.02619	1.07927	0.882737
	P06396	Gelsolin	3.1959	3.40181	3.39036	3.32935	2.88709	3.22238	3.04808	3.05252	2.66491	2.57518	2.74718	2.66242	4.66648	5.30903	4.8186	4.93137		0.238791	0.293841	0.300392	0.275554	0.238079	0.285915	0.286591	0.269081	0.235715	0.248017	0.264008	0.248868	0.272909	0.343492	0.345937	0.318261
	P00738	Haptoglobin	2.82437	2.44146	2.65609	2.64064	3.86112	3.93892	3.57239	3.79081	4.89092	4.54596	4.2387	4.55853	3.49539	2.91674	2.7874	3.06651		0.211031	0.210888	0.235335	0.218553	0.318401	0.349493	0.335889	0.334163	0.43261	0.437824	0.407346	0.426105	0.204421	0.188712	0.200113	0.197907
	P02790	Hemopexin	0.744199	0.726034	0.745491	0.738575	0.837415	0.771451	0.712887	0.773918	1.72287	1.62303	1.64798	1.66463	0.974727	0.994124	0.918204	0.962351		0.055605	0.0627132	0.0660519	0.0611282	0.0690559	0.0684493	0.0670282	0.0682213	0.152391	0.156315	0.158374	0.1556	0.0570048	0.0643194	0.0659197	0.0621083
	Q14520	Hyaluronan-binding protein 2	18.4921	16.4811	16.9564	17.3099	4.24487	4.07598	4.02676	4.11587	2.90193	2.60588	2.67566	2.72783	18.0638	16.1179	14.42	16.2006		1.38169	1.4236	1.50237	1.43265	0.350046	0.361654	0.37861	0.362817	0.25668	0.250974	0.257135	0.254982	1.05642	1.04282	1.03524	1.04555
	P01876;P01877	Ig alpha-1 chain C region	6.71434	6.20524	5.89707	6.27222	5.70994	5.30547	5.10982	5.37508	8.12304	6.90237	6.92891	7.3181	7.40987	6.70178	5.90312	6.67159		0.501681	0.535996	0.522491	0.519121	0.47086	0.470744	0.480443	0.473816	0.718495	0.66477	0.665879	0.684055	0.433351	0.433602	0.423797	0.430572
	P01857	Ig gamma-1 chain C region	17.0671	14.8087	14.9565	15.6108	13.2785	12.079	11.4197	12.2591	24.845	22.2059	22.6949	23.2486	15.364	13.9183	12.9077	14.0633		1.27522	1.27915	1.32517	1.29203	1.09499	1.07174	1.07372	1.08064	2.19758	2.13866	2.18102	2.17315	0.898532	0.900508	0.92667	0.90762
	P01859	Ig gamma-2 chain C region	14.2959	11.8336	12.1357	12.7551	10.1074	9.83865	9.65337	9.86647	11.2615	9.33282	9.53143	10.0419	17.8879	16.3314	14.9653	16.3949		1.06816	1.02216	1.07524	1.05568	0.833488	0.872964	0.907644	0.869736	0.996099	0.898848	0.915986	0.938662	1.04614	1.05664	1.07439	1.05809
	P01860	Ig gamma-3 chain C region	1.72487	1.57457	1.42179	1.57374	1.322	1.23288	1.24615	1.26701	1.90689	1.76998	1.82524	1.83404	1.51648	1.35994	1.25838	1.37827		0.128878	0.136008	0.125973	0.130251	0.109017	0.109391	0.117167	0.111688	0.168667	0.170468	0.175409	0.171435	0.0886883	0.0879874	0.0903414	0.0889506
	P01861	Ig gamma-4 chain C region	0.400991	0.306901	0.306814	0.338235	0.317415	0.26953	0.28499	0.290645	0.89832	0.579517	0.567598	0.681812	0.392421	0.328087	0.311456	0.343988		0.0299612	0.0265094	0.0271843	0.0279941	0.0261751	0.0239148	0.0267958	0.0256205	0.0794578	0.0558136	0.054547	0.0637319	0.0229499	0.0212271	0.02236	0.0222003
	P01834	Ig kappa chain C region	32.1148	30.0212	30.213	30.783	30.7709	28.1276	27.3335	28.744	45.776	42.145	43.6334	43.8515	32.5576	30.6738	27.1765	30.136		2.39955	2.59317	2.67693	2.54776	2.53747	2.4957	2.56999	2.5338	4.04895	4.05901	4.19323	4.09899	1.90406	1.98459	1.95106	1.94492
	P0CG05;P0CF74;P0CG06	Ig lambda-2 chain C regions	11.8506	9.26611	12.8368	11.3178	14.6211	11.263	13.4387	13.1076	14.0276	13.6353	12.7736	13.4788	10.5513	7.85839	11.2575	9.88906		0.885448	0.800387	1.13737	0.936721	1.20571	0.999342	1.26355	1.15544	1.24076	1.31322	1.22756	1.25992	0.61707	0.508435	0.8082	0.638221
	P01871	Ig mu chain C region	21.7682	19.9674	19.8209	20.5188	19.0187	18.7908	19.0537	18.9544	15.7741	13.3965	14.0434	14.4047	19.8147	18.7405	17.0156	18.5236		1.62647	1.72474	1.75616	1.69824	1.56834	1.66727	1.79149	1.67084	1.39524	1.29023	1.34959	1.34647	1.15882	1.2125	1.22158	1.19548
	P01591	Immunoglobulin J chain	1.4513	1.23657	1.3033	1.33039	1.44029	1.5268	1.39782	1.45497	0.962472	0.962039	0.883653	0.936055	1.50238	1.37081	1.19887	1.35735		0.108438	0.106812	0.115474	0.11011	0.118771	0.13547	0.131428	0.128257	0.0851321	0.0926545	0.0849204	0.0874971	0.0878634	0.0886906	0.0860693	0.0876009
	B9A064;P0CG04	Immunoglobulin lambda-like polypeptide 5	5.02741	3.931	5.44581	4.80141	6.20279	4.77814	5.70113	5.56069	5.95098	5.78454	5.41899	5.71817	4.47622	3.3338	4.77582	4.19528		0.375637	0.339551	0.482509	0.397389	0.511502	0.423955	0.536041	0.490178	0.526373	0.557113	0.520774	0.534503	0.261782	0.215695	0.342866	0.270755
	P19823	Inter-alpha-trypsin inhibitor heavy chain H2	4.70189	4.36312	4.77717	4.61406	3.5257	3.72045	3.74068	3.66228	4.09188	4.55404	4.3594	4.33511	1.96048	1.83684	2.06428	1.95387		0.351315	0.376877	0.423267	0.381883	0.29074	0.330108	0.351712	0.322832	0.361933	0.438602	0.418945	0.405221	0.114655	0.118843	0.148199	0.126099
	P13645	Keratin, type I cytoskeletal 10	1.20403	1.04039	1.03208	1.09216	1.00027	0.995676	0.853252	0.949733	1.03908	1.14083	0.958722	1.04621	1.89238	1.45396	1.3696	1.57198		0.0899624	0.0898664	0.0914439	0.0903931	0.0824856	0.0883444	0.0802257	0.0837196	0.0919082	0.109874	0.0921347	0.0977938	0.110672	0.0940707	0.0983265	0.101453
	P35527	Keratin, type I cytoskeletal 9	0.951596	0.741008	0.915711	0.869438	0.86082	0.857774	0.799239	0.839278	1.29615	1.32646	1.21713	1.27991	1.87324	1.64511	1.46199	1.66011		0.0711013	0.0640067	0.0811337	0.0719591	0.070986	0.0761086	0.0751472	0.0739829	0.114647	0.127752	0.116968	0.119639	0.109553	0.106438	0.104959	0.107141
	P04264	Keratin, type II cytoskeletal 1	2.37616	2.06171	1.99931	2.14573	1.93295	1.79551	1.68294	1.8038	2.19387	2.15915	2.13163	2.16155	4.62573	4.15234	3.74197	4.17334		0.177542	0.178086	0.177142	0.177591	0.159397	0.159312	0.158236	0.159006	0.194051	0.207949	0.204853	0.202049	0.270526	0.268655	0.268643	0.26934
	P35908	Keratin, type II cytoskeletal 2 epidermal	4.4373	3.96605	4.69554	4.3663	8.56951	7.17483	6.97641	7.57359	6.02574	5.9985	5.83995	5.95473	8.79832	6.85198	6.70829	7.45286		0.331545	0.342579	0.416034	0.361377	0.70667	0.636608	0.655947	0.667616	0.532986	0.577719	0.561229	0.556615	0.514551	0.44332	0.481602	0.480994
	P01042	Kininogen-1	9.68393	9.61469	3.27436	7.52433	4.45456	16.6177	4.26253	8.44494	3.42849	3.43203	3.30735	3.38929	19.463	16.2445	4.5958	13.4345		0.723563	0.830497	0.290114	0.622752	0.367337	1.47446	0.400778	0.744427	0.303256	0.330541	0.317841	0.316812	1.13825	1.05102	0.329942	0.867034
	P51884	Lumican	13.7935	12.394	12.041	12.7428	12.2771	12.2923	10.8589	11.8094	11.0064	10.2503	10.4179	10.5582	16.6229	16.4873	14.5466	15.8856		1.03062	1.07056	1.06685	1.05466	1.01241	1.09067	1.02099	1.04101	0.973534	0.987208	1.00118	0.986921	0.972157	1.06672	1.04433	1.02523
	P27918	Properdin	3.44787	2.84052	3.09191	3.12677	4.39443	4.62012	4.6345	4.54968	1.9124	1.79931	1.86583	1.85918	2.35545	2.30992	2.32674	2.3307		0.257617	0.245358	0.273949	0.258787	0.362379	0.409934	0.435752	0.401057	0.169155	0.173292	0.17931	0.173786	0.137754	0.149451	0.167041	0.150419
	P02760	Protein AMBP	1.29419	1.11148	1.06466	1.15677	0.48586	0.450709	0.428008	0.454859	0.442455	0.399572	0.402991	0.415006	0.335532	0.294865	0.269261	0.299886		0.0966989	0.0960071	0.0943309	0.0957406	0.0400656	0.0399905	0.0402428	0.0400961	0.0391358	0.0384829	0.0387281	0.0387924	0.0196229	0.0190776	0.0193308	0.0193541
	P00734	Prothrombin	7.44082	7.37878	7.0183	7.2793	5.49386	6.43124	6.28213	6.06908	6.03632	6.41976	6.34479	6.26696	6.43371	7.70293	7.19815	7.1116		0.555962	0.637363	0.621834	0.602472	0.453041	0.570632	0.590668	0.534993	0.533921	0.61829	0.609745	0.5858	0.376262	0.498376	0.51677	0.458969
	Q15413	Ryanodine receptor 3	4.70815	5.22476	5.21788	5.05026	5.79402	5.48284	5.54533	5.6074	4.67381	4.8438	4.7127	4.74344	8.09265	8.97147	8.14353	8.40255		0.351783	0.451304	0.462314	0.417986	0.477793	0.486482	0.521392	0.494296	0.413405	0.466509	0.452898	0.44339	0.473281	0.58045	0.584641	0.542284
	Q13103	Secreted phosphoprotein 24	3.27957	2.87872	3.00852	3.0556	1.4378	1.43435	1.38777	1.41997	0.982575	0.949288	0.938504	0.956789	4.36893	3.87297	3.48491	3.90894		0.245042	0.248658	0.26656	0.252897	0.118566	0.127267	0.130483	0.125172	0.0869103	0.0914264	0.0901917	0.0894352	0.255508	0.25058	0.250189	0.252275
	P02787	Serotransferrin	1.63848	1.58382	1.4893	1.57054	2.00125	1.81516	1.75471	1.85704	5.07949	4.77609	4.63761	4.83106	1.5666	1.39057	1.29636	1.41784		0.122424	0.136807	0.131955	0.129986	0.16503	0.161055	0.164984	0.163699	0.449288	0.459988	0.445682	0.45158	0.0916191	0.0899694	0.0930681	0.0915047
	P02768	Serum albumin	486.3	417.995	398.39	434.228	487.217	437.428	410.811	445.152	408.685	359.736	359.773	376.065	775.124	705.102	619.705	699.977		36.3353	36.1055	35.2981	35.9389	40.1775	38.8121	38.6259	39.2404	36.1488	34.6464	34.5748	35.1524	45.3315	45.6198	44.4899	45.1752
	P0DJI8;P0DJI9	Serum amyloid A-1 protein	1.91706	1.89967	1.9954	1.93738	2.33974	2.21489	2.20031	2.25165	1.94385	1.71341	1.81759	1.82495	3.13516	2.99031	2.74894	2.95814		0.143239	0.16409	0.176796	0.160347	0.192942	0.196523	0.206881	0.198484	0.171937	0.165019	0.174673	0.170586	0.183353	0.193472	0.197352	0.190912
	P27169	Serum paraoxonase/arylesterase 1	2.04767	1.78984	1.68616	1.84122	1.68112	1.4602	1.4705	1.53728	2.0537	1.95688	1.97233	1.9943	1.92899	1.60732	1.49232	1.67621		0.152997	0.154603	0.149397	0.152389	0.138631	0.129561	0.138262	0.135512	0.181653	0.188468	0.189544	0.186416	0.112813	0.103993	0.107137	0.108179
	P02766	Transthyretin	2.44909	2.30914	2.11633	2.29152	2.40057	2.25077	2.17311	2.27482	2.51872	2.54375	2.62289	2.56179	3.6864	3.58594	3.27948	3.51727		0.182991	0.199458	0.187511	0.189658	0.197959	0.199706	0.204323	0.200526	0.222785	0.24499	0.252064	0.239462	0.215591	0.232009	0.235441	0.226998
	P02774	Vitamin D-binding protein	6.13662	5.59103	5.39103	5.70623	9.05714	8.33477	8.12777	8.50656	6.62368	5.63858	5.72467	5.99564	11.9871	11.4479	9.96556	11.1335		0.458515	0.482941	0.477655	0.472276	0.746881	0.739528	0.764202	0.749859	0.585874	0.543055	0.55015	0.560439	0.701041	0.740671	0.715448	0.718535
	P04070	Vitamin K-dependent protein C	1.77692	1.57115	1.60629	1.65146	0.785889	0.651027	0.693623	0.710179	0.383541	0.328025	0.323517	0.345028	1.56111	1.45875	1.29431	1.43806		0.132768	0.135713	0.14232	0.136683	0.0648069	0.0577643	0.0652169	0.0626028	0.0339248	0.0315922	0.0310905	0.0322512	0.0912983	0.0943805	0.0929212	0.0928094
	P07225	Vitamin K-dependent protein S	1.87147	1.7431	1.64722	1.75393	1.55394	1.40004	1.37444	1.4428	1.01281	0.866341	0.838307	0.905818	1.30587	1.12899	1.05815	1.16434		0.139832	0.150565	0.145947	0.145164	0.128143	0.124223	0.129229	0.127184	0.0895842	0.0834377	0.0805626	0.0846707	0.0763712	0.0730452	0.0759664	0.075144
	P22891	Vitamin K-dependent protein Z	2.37168	2.21964	2.23708	2.27613	2.31442	2.28757	2.17201	2.258	1.62367	1.43099	1.43855	1.49774	3.24569	3.04549	2.6624	2.98453		0.177207	0.191728	0.198209	0.188384	0.190855	0.202972	0.20422	0.199044	0.143616	0.137819	0.138247	0.14	0.189817	0.197042	0.191139	0.192616
	P04004	Vitronectin	133.005	121.821	122.851	125.892	129.293	113.992	111.33	118.205	108.818	104.906	105.344	106.356	261.63	235.281	216.066	237.659		9.93788	10.5226	10.8848	10.4195	10.6619	10.1143	10.4677	10.4199	9.62509	10.1035	10.1237	9.94154	15.3009	15.2226	15.5118	15.338
		total amount	1338.37	1157.7	1128.64	1208.24	1212.66	1127.04	1063.56	1134.42	1130.56	1038.31	1040.57	1069.81	1709.9	1545.6	1392.91	1549.47
